# Supplementary material
Source: publisher site journal article supplement (https://www.spandidos-publications.com/2557/downloadSupplementary)
Supplement: Supplementary file 1 [file downloadSupplementary]

## Sheet: Table S3
Table SIII. Genes with a more frequent mutation in BMs from the lung
Gene
BLM
PDE4DIP
INPP4B
PTPRD
AFF3
HIF1A
CYP2C19
ARID1A
TGM7
